## CONTENTS

### ARTICLES

- s111 **Building the Evidence for Safe Return to School During the COVID-19 Pandemic**  
Alison N. Cernich et al
- s113 **School-Academic Partnerships in Support of Safe Return to Schools During the COVID-19 Pandemic**  
Emily M. D'Agostino et al
- s122 **Building a National Framework to Pair Scientists and Schools During a Global Pandemic** Kanecia O. Zimmerman et al
- s130 **From Research to Policy: Reopening K–12 Schools in North Carolina During the COVID-19 Pandemic** Kanecia O. Zimmerman et al
- s134 **Mobilizing Established School Partnerships to Reach Underserved Children During a Global Pandemic** Linda K. Ko et al
- s145 **Implementation of School-Based COVID-19 Testing Programs in Underserved Populations** Emily E. Haroz et al
- s159 **Supporting COVID-19 School Safety for Children With Disabilities and Medical Complexity** Michael R. Sherby et al
- s168 **Masking Adherence in K–12 Schools and SARS-CoV-2 Secondary Transmission** Ganga S. Moorthy et al
- s177 **A School-Based SARS-CoV-2 Testing Program: Testing Uptake and Quarantine Length After In-School Exposures** Angelique E. Boutzoukas et al
- s185 **Secondary Transmission of COVID-19 in K-12 Schools: Findings From 2 States** Angelique E. Boutzoukas et al
- s193 **Quarantine Elimination for K–12 Students With Mask-on-Mask Exposure to SARS-CoV-2** Angelique E. Boutzoukas et al
- s199 **Urban Classification, Not COVID-19 Community Rates, Was Associated With Modes of Learning in United States K–12 Schools?** Jennifer L. Goldman et al

doi: 10.1542/peds.2021-054268

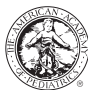

Source: https://aap2.silverchair-cdn.com/aap2/content_public/journal/pediatrics/issue/149/supplement_2/3/toc.pdf
